# Supplementary material for: A Critical Role for Neurofascin in Regulating Action Potential Initiation through Maintenance of the Axon Initial Segment
Source: PubMed Central journal article supplement (PMC3057015; doi:10.1016/j.neuron.2011.02.021), 2011-03-10
Supplement: mmc1.pdf [file mmc1.pdf]

Neuron, Volume 69

## **Supplemental Information**

# **A Critical Role for Neurofascin in Regulating Action Potential Initiation through Maintenance of the Axon Initial Segment**

Barbara Zonta, Anne Desmazieres, Arianna Rinaldi, Steven Tait, Diane L. Sherman, Matthew F. Nolan, and Peter J. Brophy

### **Inventory of Supplementary Information:**

**Figures S1, S2 and S3**

**Movie S1 (see separate video)**

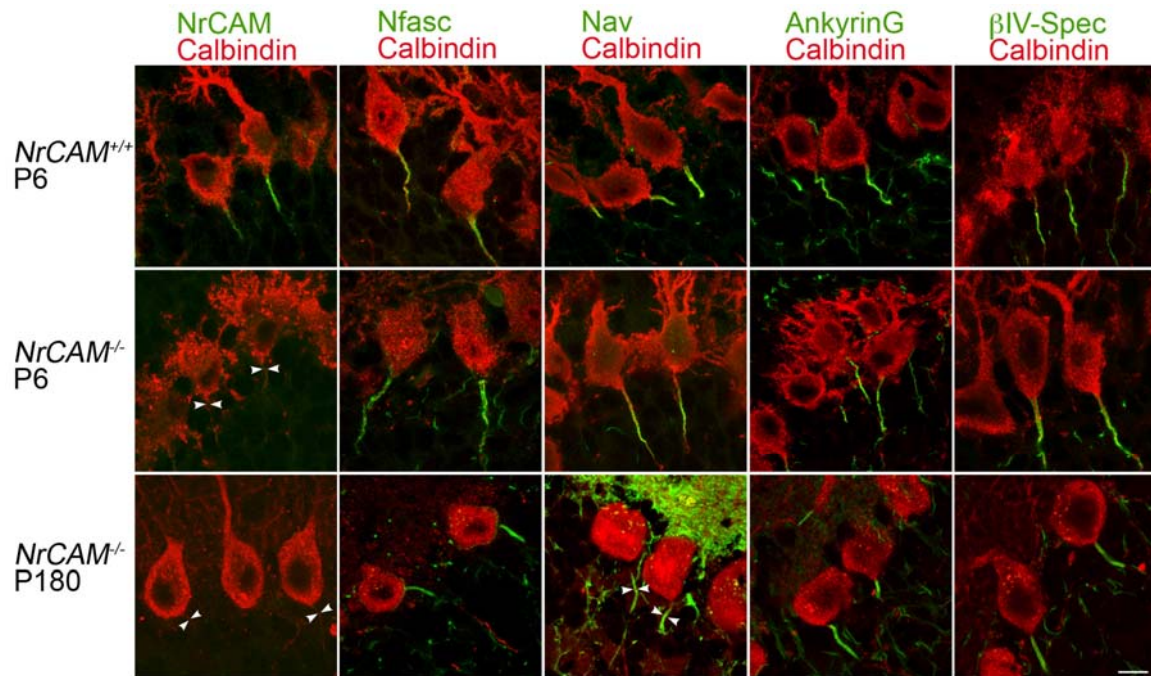

**Figure S1, related to Figure 1. Ablation of *NrCAM* Affects neither the Assembly nor Stability of the AIS**

Immunofluorescence of Calbindin-positive Purkinje cells from cerebella cryostat sections in *NrCAM*-null mice and wild-type littermates at post-natal day 6 (P6) showing that *NrCAM* is not required to target either Nfasc186 or other components of the AIS including  $\text{Na}_v$  channels and the cytoskeletal proteins AnkyrinG and  $\beta\text{IV}$  Spectrin. These proteins are still maintained at the AIS in *NrCAM*-null mice at P180 (arrowheads point to AIS). Scale bar, 10  $\mu\text{m}$

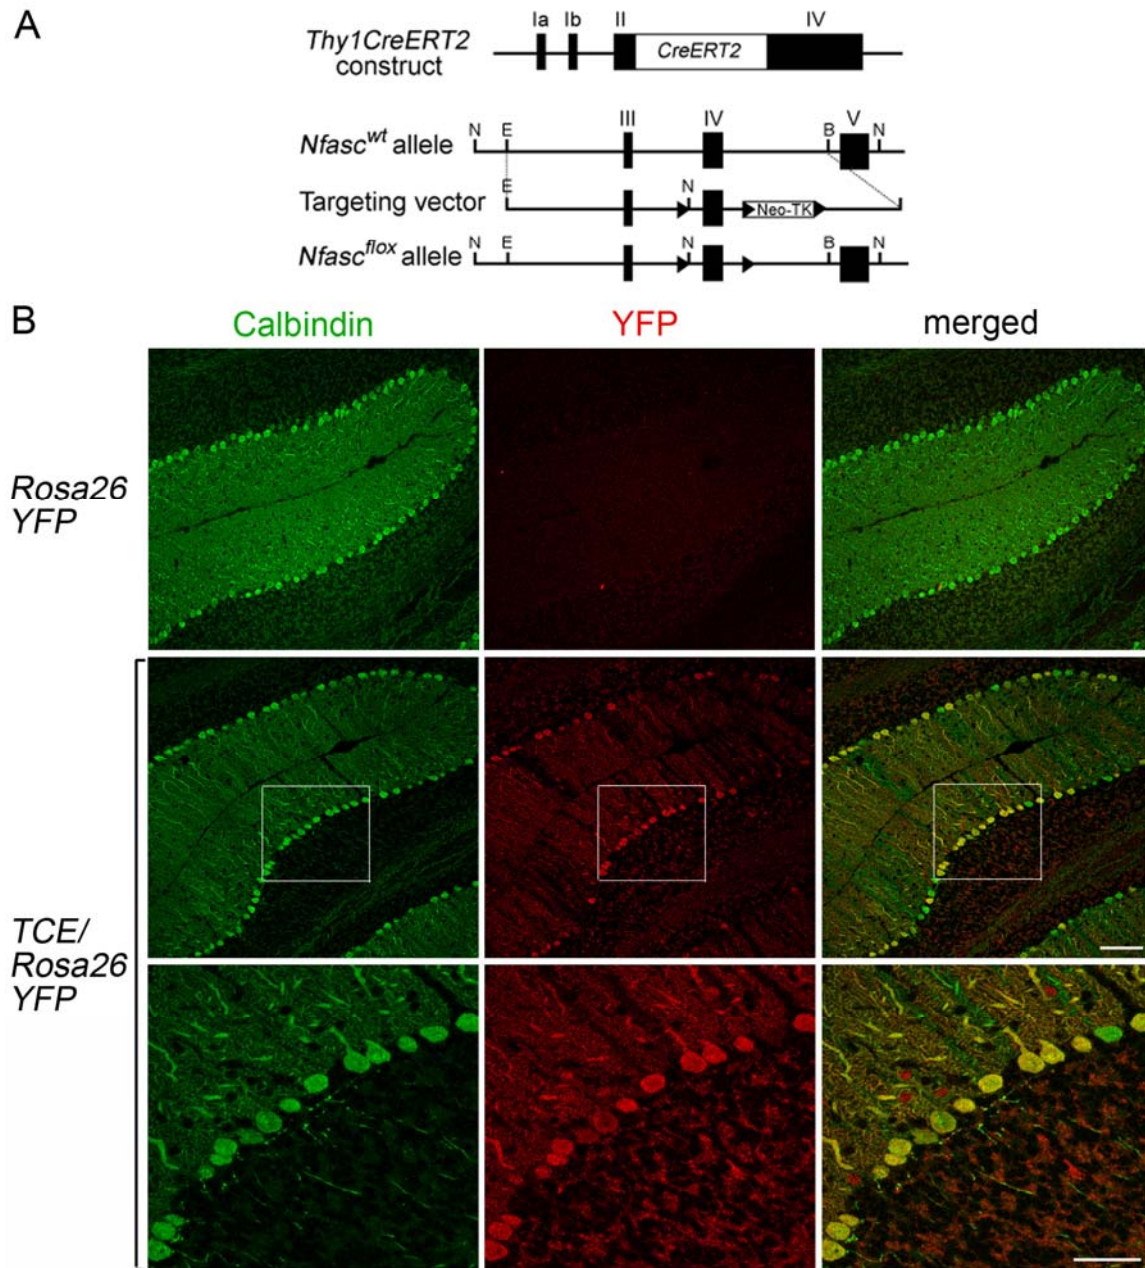

**Figure S2, related to Figure 3. Characterisation of the *TCE* Transgenic Mouse**

(A) Schematic diagram of the *Thy1CreERT2* (*TCE*) transgene, wild-type *Nfasc* gene, targeting vector and floxed allele after Cre-mediated excision of the PGK*neo*-HSV*tk* cassette. The *CreERT2* cassette was inserted downstream of the *Thy1.2* promoter for the expression of tamoxifen-inducible Cre specifically in neurons. The floxed allele of the

*Nfasc* gene contains two *loxP* sites flanking exon IV. Cre recombination of the floxed *Nfasc* allele leads to the deletion of exon IV resulting in a transcript with an in-frame stop codon in exon V leading to the known loss of Neurofascin protein expression (Sherman et al., 2005). N, NcoI; E, EheI; B, BamHI

(B) Immunofluorescence analysis of Cre activity in the cerebellum. Mice carrying the *TCE* transgene were mated with the *Rosa26YFP* reporter line to determine the expression and activity pattern of CreERT2 in the cerebellum. Analysis of YFP expression in *TCE/Rosa26YFP* mice 6 weeks after tamoxifen treatment shows strong expression of YFP in Purkinje cells (stained for Calbindin). Scale Bars : 100  $\mu\text{m}$  (low power) and 50  $\mu\text{m}$  (high power).

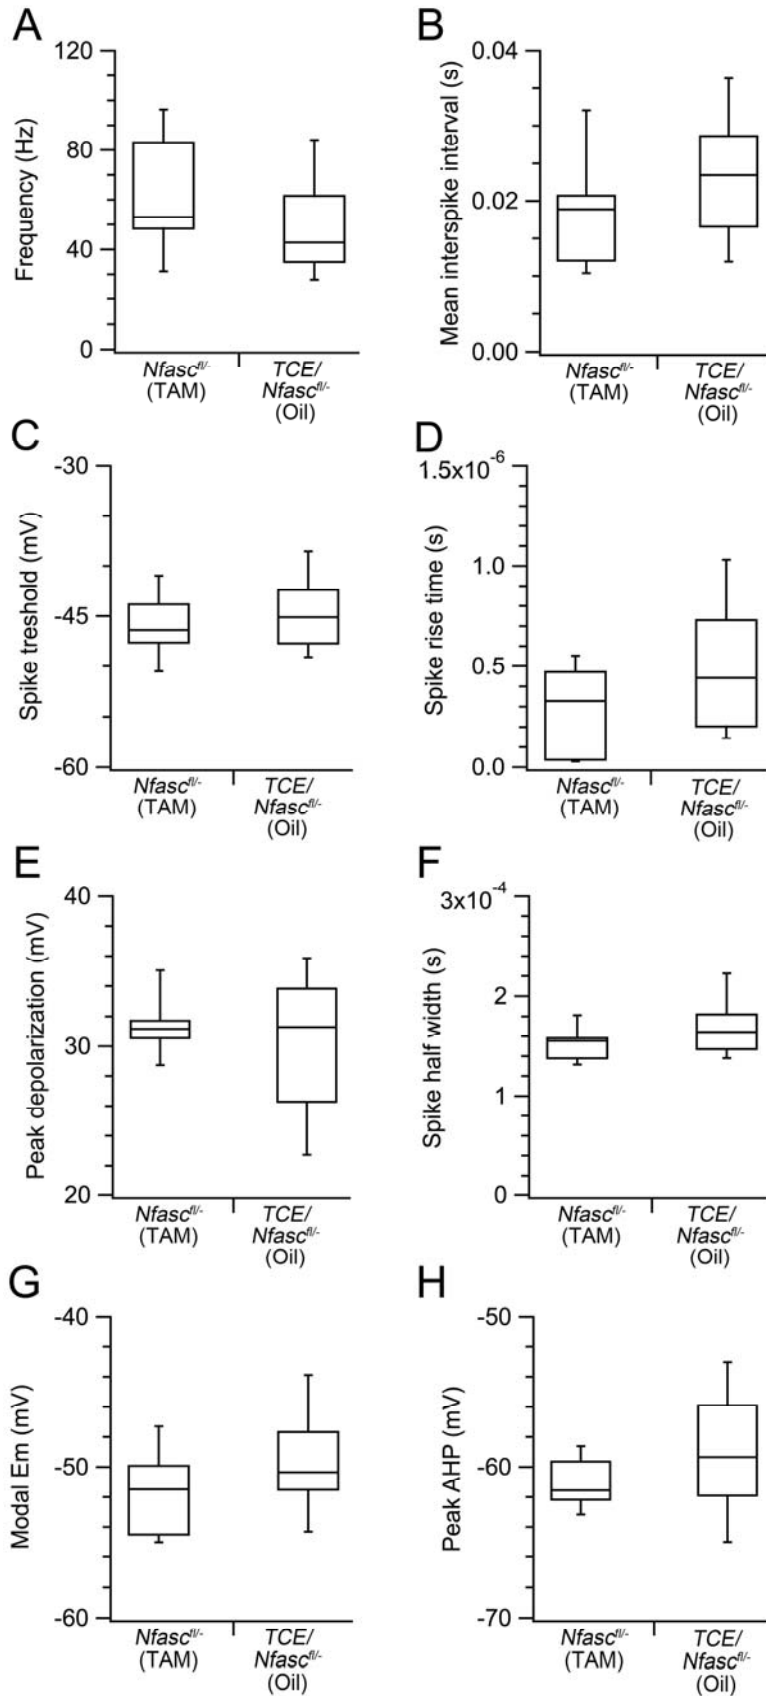

**Figure S3, related to Figure 6. Properties of Spontaneous Action Potentials in Purkinje Cells do Not Differ Between the Two Control Groups**

(A-F) There was no difference between *Nfasc<sup>fl/-</sup>*(TAM) (n=8) and *TCE/Nfasc<sup>fl/-</sup>*(Oil) (n=10) mice in the mean frequency (A), the mean interspike interval (B), the threshold (C), the 10%-90% rise time (D), the peak depolarization (E) and the half-width of spontaneous action potentials (F) ( $t_{16} < 1.6$ ,  $P > 0.1$ ).

(G-H) There was also no difference in the modal membrane potential (G) and the peak of the afterhyperpolarization (H) ( $t_{16} < 1.6$ ,  $P > 0.1$ ).

In the box plots, the horizontal bar is the median, the boxes indicate the 25–75 percentile range, and the vertical lines indicate the 10–90 percentile range.
